# Supplementary material for: Visual detection of glucose using triangular silver nanoplates and gold nanoparticles
Source: Royal Society of Chemistry journal article supplement (doi:10.1039/c7ra00593h), 2017-01-01
Supplement: c7ra00593h1.pdf [file c7ra00593h1.pdf]

## Visual detection of glucose using triangular silver nanoplates and gold nanoparticles

Tuanjie Cai, Yan Gao, Jilin Yan, Ying Wu, Junwei Di\*

*College of Chemistry, Chemical Engineering and Material Science, Soochow University, Suzhou, 215123, PR China.*

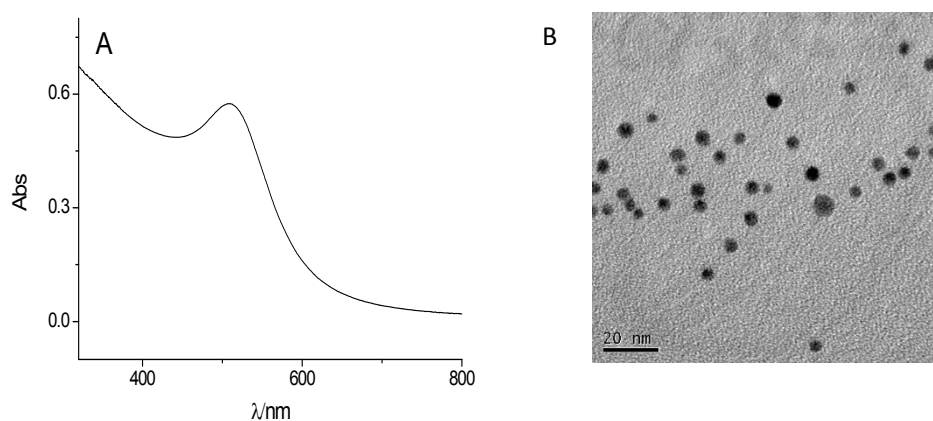

Figure S1 UV-vis absorption spectrum (A) and TEM image (B) of Au NPs.

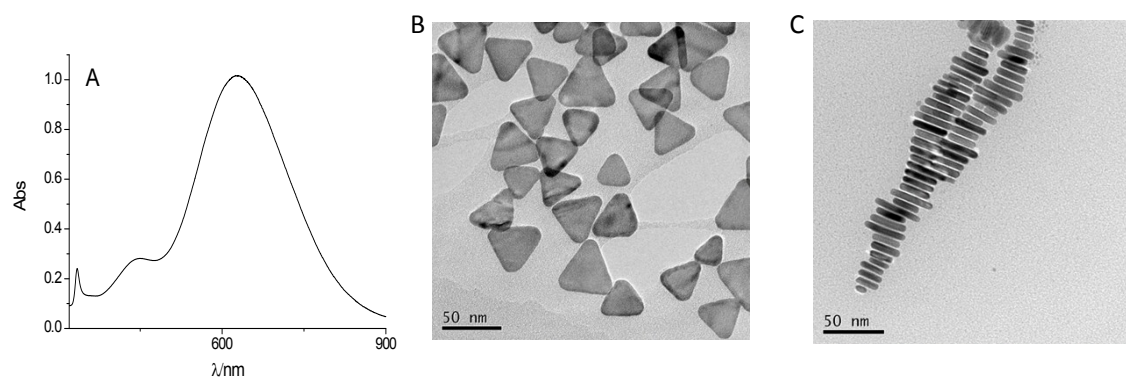

Figure S2 UV-vis absorption spectrum (A) and TEM image (B and C) of Ag TNPs.

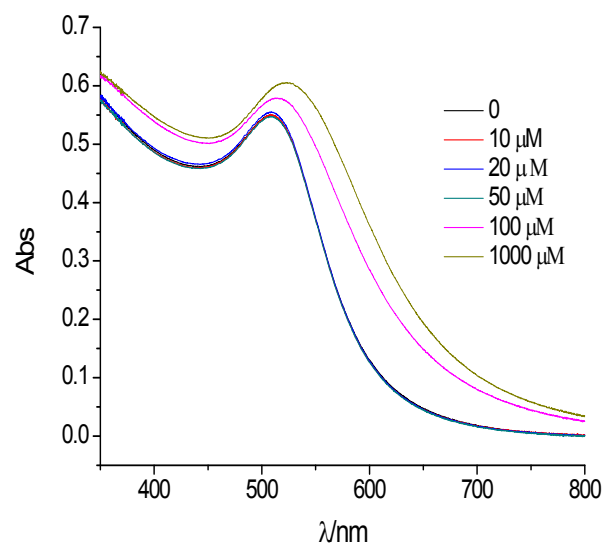

Fig. S3 UV-vis absorption spectra of Au NPs before and after addition of different concentration of Cys.

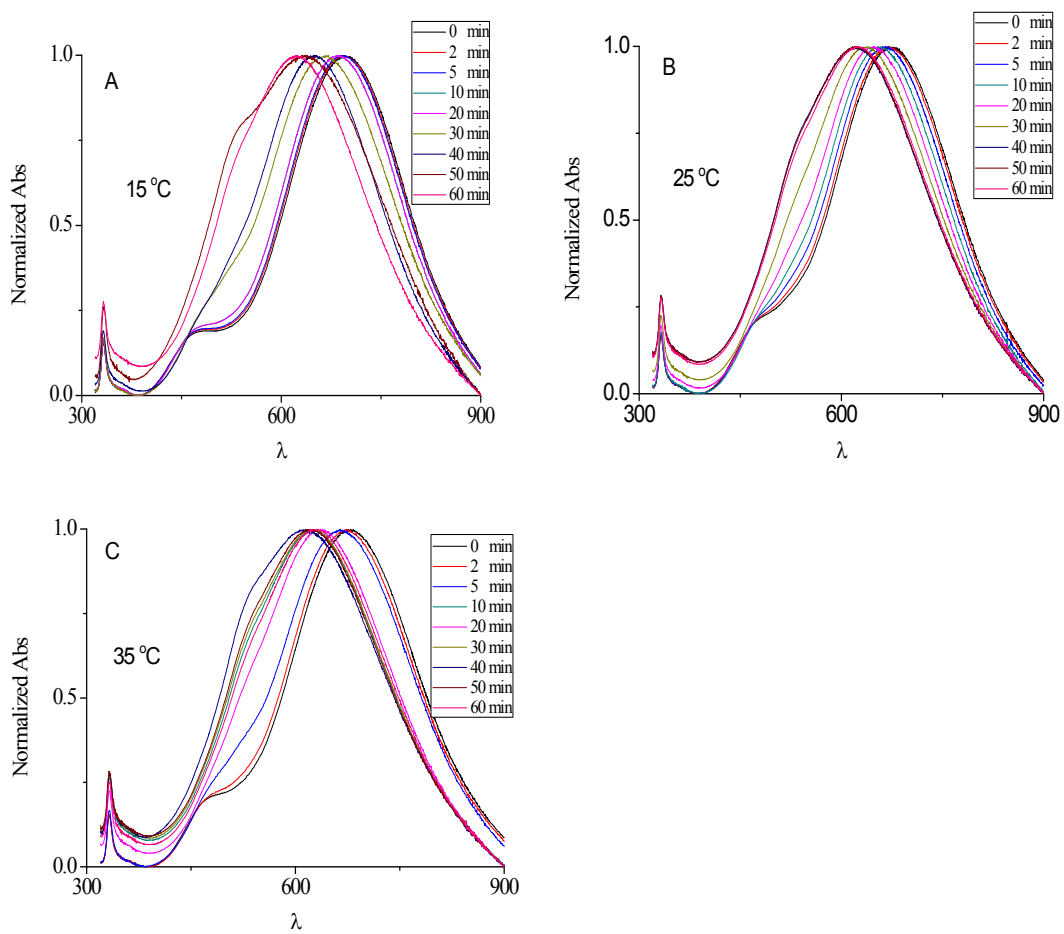

Fig. S4 UV-vis absorption spectra of different catalytic times and temperatures.

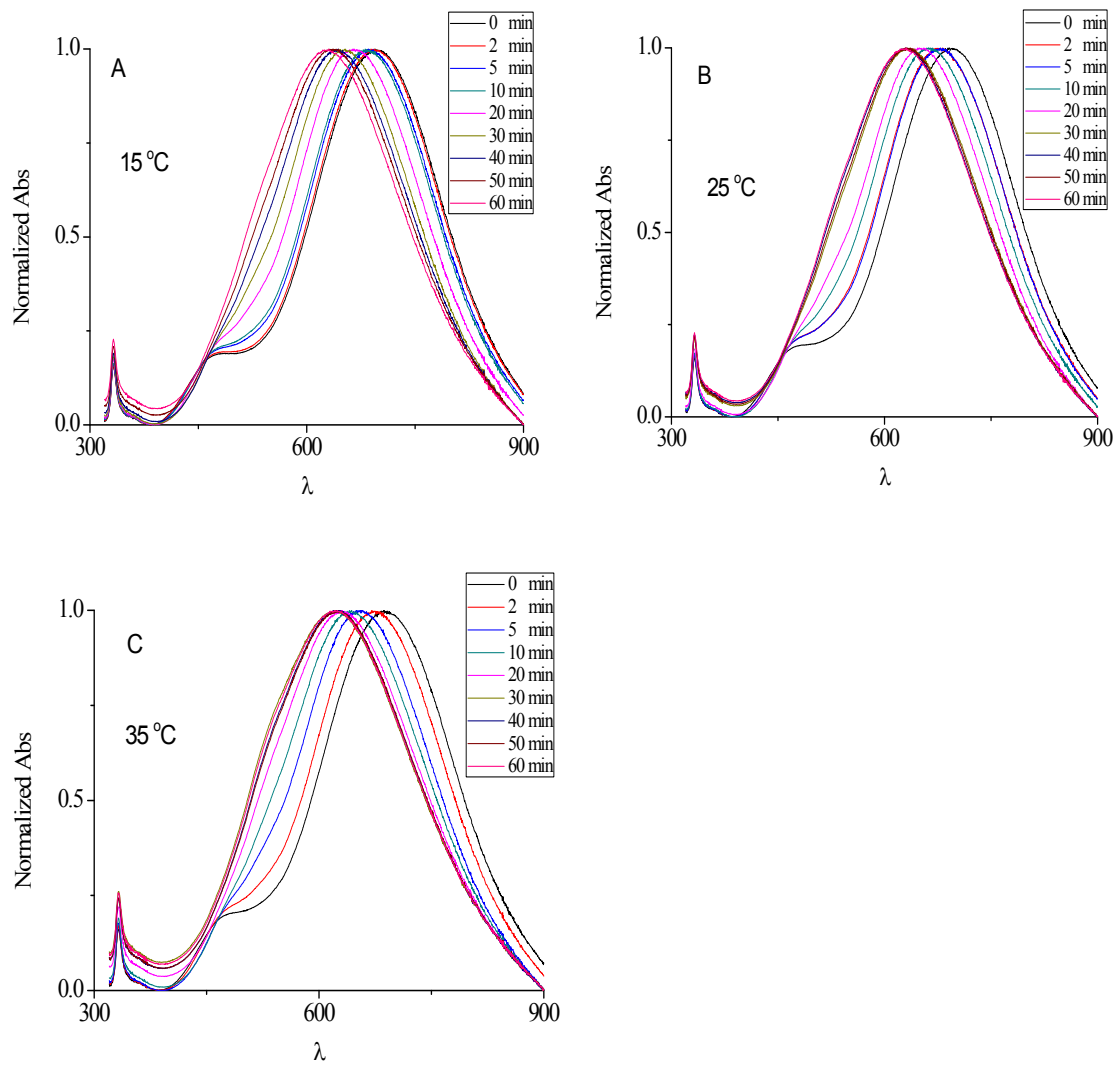

Fig. S5 UV-vis absorption spectra of different etching times and temperature.
